# Supplementary material for: Effect of Empagliflozin on Cardiovascular and Renal Outcomes in Patients With Heart Failure by Baseline Diabetes Status: Results From the EMPEROR-Reduced Trial
Source: PubMed Central journal article supplement — Circulation. 2020 Nov 11;143(4):337–49. doi: 10.1161/CIRCULATIONAHA.120.051824 (PMC7834911; doi:10.1161/circulationaha.120.051824), 2020-11-11

## **SUPPLEMENTAL MATERIAL**

## Supplemental Table I

Baseline characteristics of patients with prediabetes vs those with normoglycemia

|                                                            | Prediabetes (n=1268)  |                   | Normoglycemia (n=606) |                   |
|------------------------------------------------------------|-----------------------|-------------------|-----------------------|-------------------|
|                                                            | Empagliflozin (n=632) | Placebo (n=636)   | Empagliflozin (n=304) | Placebo (n=302)   |
| Age — yr                                                   | 68.1±11.2             | 67.1±11.7         | 66.5±12.5             | 64.7±12.6         |
| Female sex — no. (%)                                       | 147 (23.3)            | 163 (25.6)        | 80 (26.3)             | 75 (24.8)         |
| Race — no. (%)                                             |                       |                   |                       |                   |
| White                                                      | 447 (70.7)            | 443 (69.7)        | 232 (76.3)            | 222 (73.5)        |
| Black                                                      | 46 (7.3)              | 46 (7.2)          | 20 (6.6)              | 25 (8.3)          |
| Asian                                                      | 112 (17.7)            | 125 (19.7)        | 42 (13.8)             | 35 (11.6)         |
| Other or Missing                                           | 27 (4.3)              | 22 (3.5)          | 10 (3.3)              | 20 (6.6)          |
| Region — no. (%)                                           |                       |                   |                       |                   |
| North America                                              | 81 (12.8)             | 70 (11.0)         | 24 (7.9)              | 28 (9.3)          |
| Latin America                                              | 207 (32.8)            | 213 (33.5)        | 123 (40.5)            | 118 (39.1)        |
| Europe                                                     | 231 (36.6)            | 231 (36.3)        | 113 (37.2)            | 118 (39.1)        |
| Asia                                                       | 90 (14.2)             | 93 (14.6)         | 35 (11.5)             | 31 (10.3)         |
| Other                                                      | 23 (3.6)              | 29 (4.6)          | 9 (3.0)               | 7 (2.3)           |
| NYHA functional classification — no. (%)                   |                       |                   |                       |                   |
| II                                                         | 498 (78.8)            | 498 (78.3)        | 244 (80.3)            | 235 (77.8)        |
| III                                                        | 132 (20.9)            | 136 (21.4)        | 58 (19.1)             | 66 (21.9)         |
| IV                                                         | 2 (0.3)               | 2 (0.3)           | 2 (0.7)               | 1 (0.3)           |
| Body mass index                                            | 27.3±5.3              | 26.9±5.2          | 26.9±5.3              | 27.2±5.1          |
| Heart rate — beats/min                                     | 70.1±11.7             | 71.1±12.3         | 68.9±11.5             | 70.5±11.8         |
| Systolic blood pressure — mm Hg                            | 121.3±15.3            | 118.9±14.4        | 123.5±17.1            | 122.0±15.9        |
| HbA1c, %                                                   | 5.9±0.3               | 6.0±0.2           | 5.3±0.3               | 5.3±0.3           |
| Left ventricular ejection fraction — %                     | 27.9±5.8              | 27.1±6.2          | 27.9±6.2              | 27.4±5.6          |
| Median NT-proBNP (IQR) — pg/mL                             | 1921 (1083, 3276)     | 1866 (1158, 3654) | 1729 (1034, 3238)     | 1926 (1164, 3349) |
| Principal cause of heart failure — no. (%)                 |                       |                   |                       |                   |
| Ischemic                                                   | 303 (47.9)            | 317 (49.8)        | 126 (41.4)            | 116 (38.4)        |
| Nonischemic                                                | 329 (52.1)            | 319 (50.2)        | 178 (58.6)            | 181 (59.9)        |
| Medical history — no. (%)                                  |                       |                   |                       |                   |
| Hospitalization for heart failure in last 12 months        | 174 (27.5)            | 178 (28.0)        | 87 (28.6)             | 82 (27.2)         |
| Atrial fibrillation*                                       | 251 (39.7)            | 261 (41.0)        | 103 (33.9)            | 121 (40.1)        |
| Hypertension                                               | 420 (66.5)            | 430 (67.6)        | 199 (65.5)            | 190 (62.9)        |
| Estimated GFR                                              |                       |                   |                       |                   |
| Mean— ml/min/1.73 m <sup>2</sup>                           | 61.6±20.7             | 62.0±20.6         | 64.8±21.8             | 65.1±21.7         |
| Rate of <60 ml/min/1.73 m <sup>2</sup> — no./total no. (%) | 300 (47.5)            | 294 (46.2)        | 459 (49.5)            | 480 (51.7)        |
| Device therapy — no. (%)                                   |                       |                   |                       |                   |
| Implantable cardioverter-defibrillator <sup>†</sup>        | 232 (36.7)            | 198 (31.1)        | 88 (28.9)             | 96 (31.8)         |
| Cardiac resynchronization therapy <sup>‡</sup>             | 93 (14.7)             | 69 (10.8)         | 24 (7.9)              | 36 (11.9)         |
| Heart failure medication — no. (%)                         |                       |                   |                       |                   |
| ACE inhibitor                                              | 311 (49.2)            | 278 (43.7)        | 140 (46.1)            | 147 (48.7)        |

|                                       |            |            |            |            |
|---------------------------------------|------------|------------|------------|------------|
| ARB <sup>§</sup>                      | 148 (23.4) | 151 (23.7) | 65 (21.4)  | 76 (25.2)  |
| ARNi                                  | 112 (17.7) | 139 (21.9) | 66 (21.7)  | 54 (17.9)  |
| Diuretic <sup>  </sup>                | 535 (84.7) | 564 (88.7) | 244 (80.3) | 245 (81.1) |
| Mineralocorticoid Receptor Antagonist | 447 (70.7) | 468 (73.6) | 220 (72.4) | 226 (74.8) |
| Beta blocker                          | 602 (95.3) | 600 (94.3) | 288 (94.7) | 285 (94.4) |
| Glucose lowering therapy – no. (%)    |            |            |            |            |
| Any glucose lowering therapy          | 6 (0.9)    | 5 (0.8)    | 2 (0.7)    | 2 (0.3)    |
| Biguanide                             | 6 (0.9)    | 4 (0.6)    | 1 (0.3)    | 0          |
| Insulin                               | 0          | 0          | 0          | 0          |
| Sulfonylurea                          | 0          | 0          | 0          | 0          |
| DPP4-inhibitors                       | 0          | 0          | 0          | 0          |
| GLP1 receptor analogues               | 0          | 0          | 0          | 0          |

Data given as mean±standard deviation unless otherwise stated

\*Atrial fibrillation reported in any ECG before treatment intake or history of atrial fibrillation reported as medical history

†Implantable cardioverter defibrillator with or without cardiac resynchronization therapy.

‡Cardiac resynchronization therapy with or without a defibrillator

§Excluding valsartan when taken with sacubitril because sacubitril/valsartan is shown as ARNI

||Diuretics other than mineralocorticoid receptor antagonists

NYHA=New York Heart Association; ARB=Angiotensin Receptor Blocker; ACE=Angiotensin Converting enzyme; ARNI=Angiotensin receptor neprilysin inhibition; GFR= Glomerular filtration rate; NT-pro BNP=N-Terminal prohormone B-type natriuretic peptide

**Supplementary Figure I – Adjusted mean changes in eGFR (CKD-EPI) from baseline over time, mean slope of change in eGFR, and change in eGFR from baseline to follow-up in patients with diabetes (A), prediabetes (B), and normoglycemia (C).**

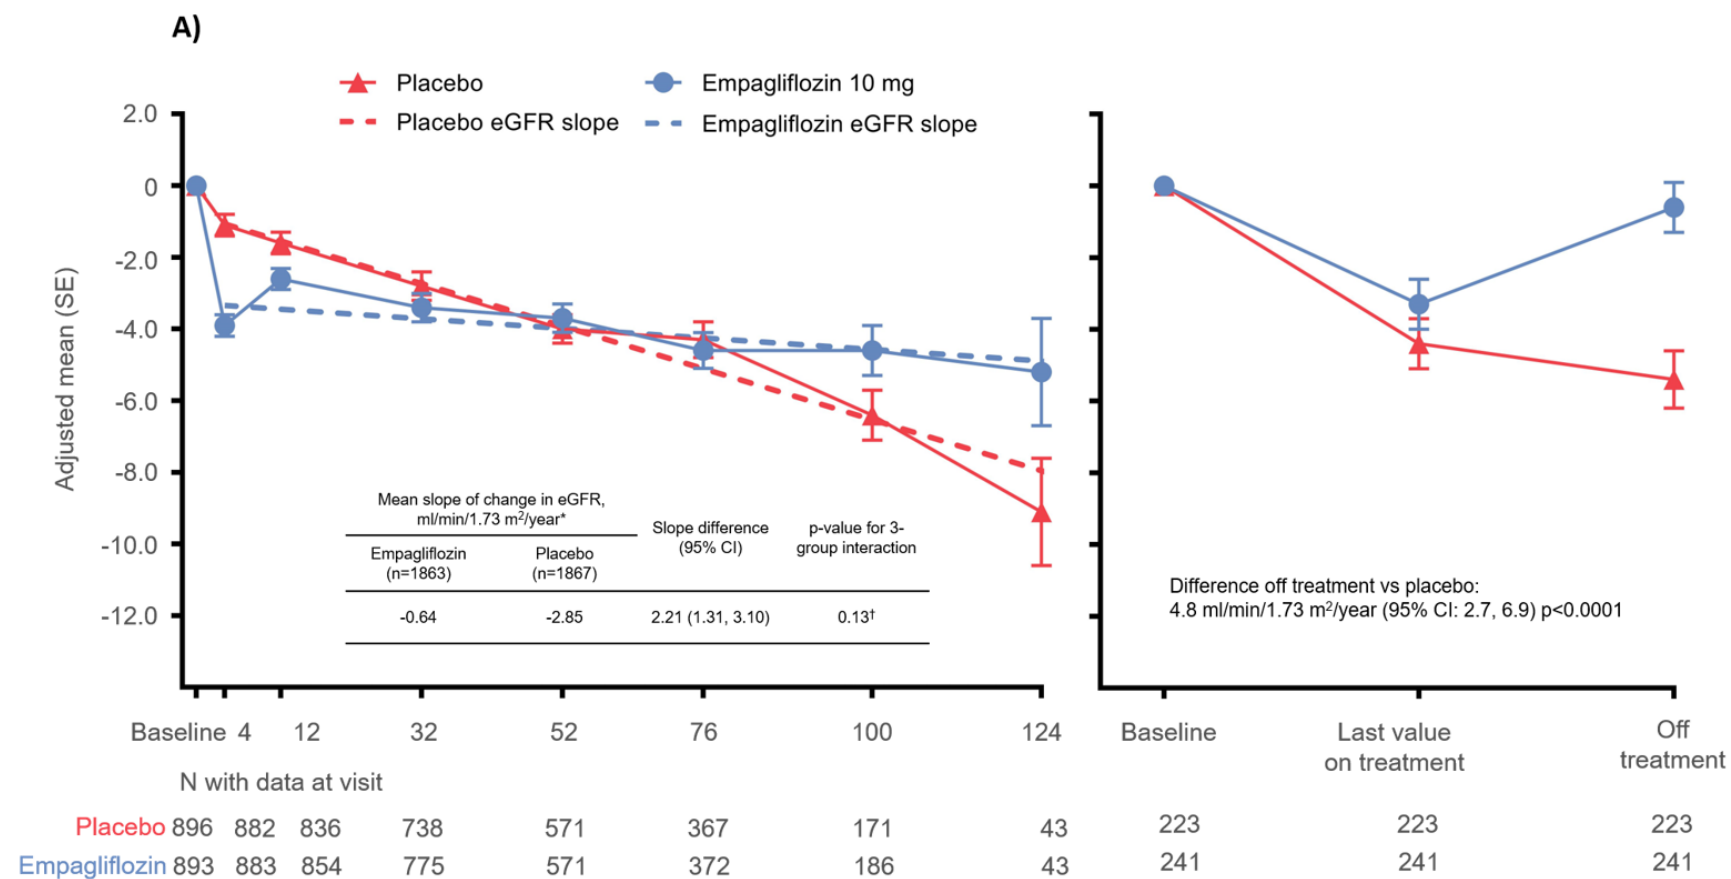

**B)**

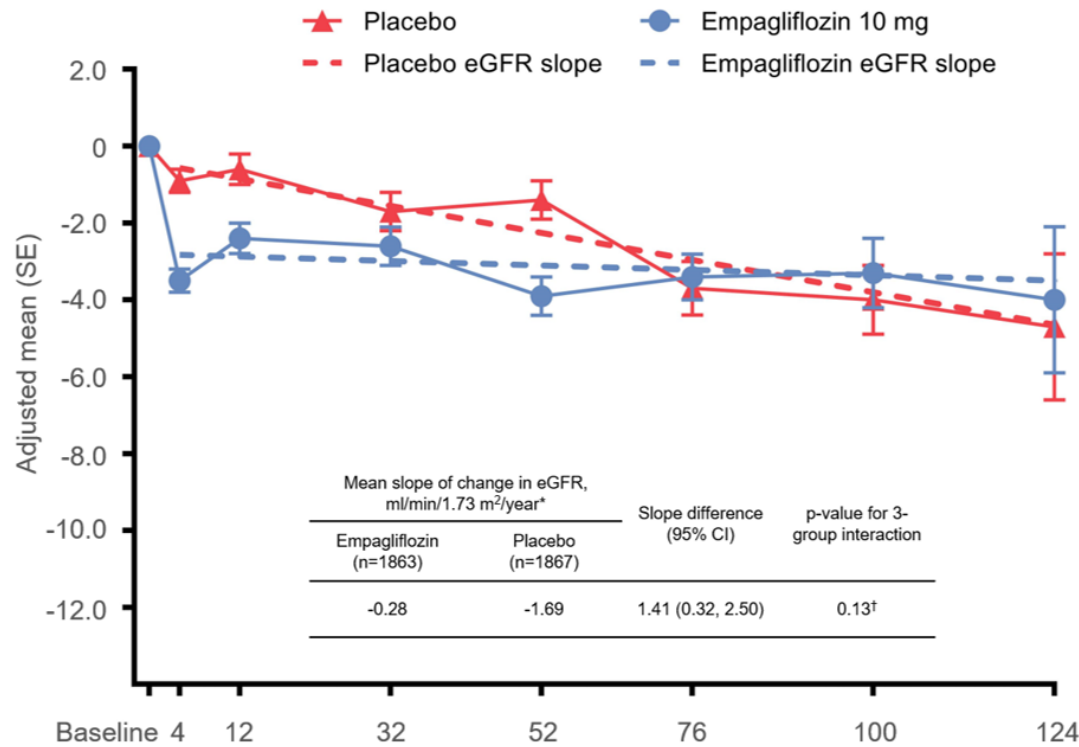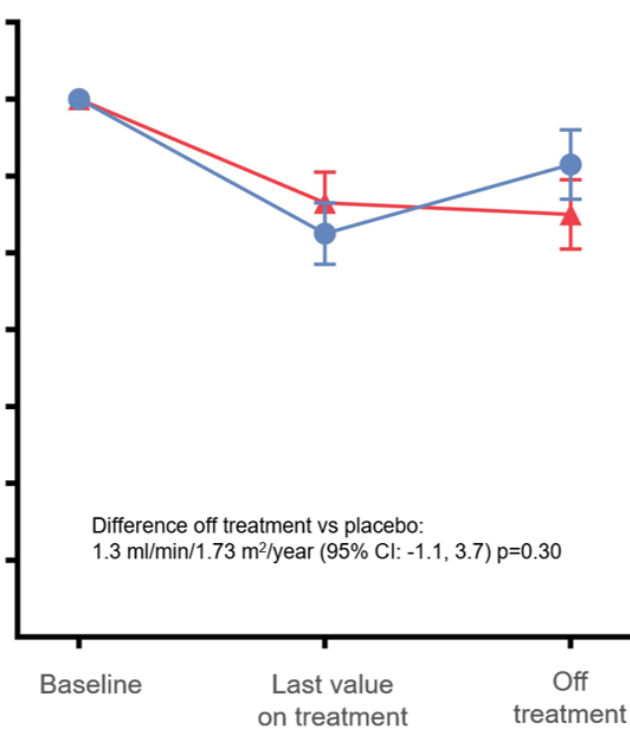

|                      | Baseline | 4 | 12 | 32 | 52 | 76 | 100 | 124 |
|----------------------|----------|---|----|----|----|----|-----|-----|
| N with data at visit |          |   |    |    |    |    |     |     |

|               |     |     |     |     |     |     |     |    |     |     |     |
|---------------|-----|-----|-----|-----|-----|-----|-----|----|-----|-----|-----|
| Placebo       | 601 | 593 | 565 | 504 | 365 | 244 | 118 | 26 | 176 | 176 | 176 |
| Empagliflozin | 612 | 607 | 585 | 532 | 399 | 245 | 115 | 25 | 174 | 174 | 174 |

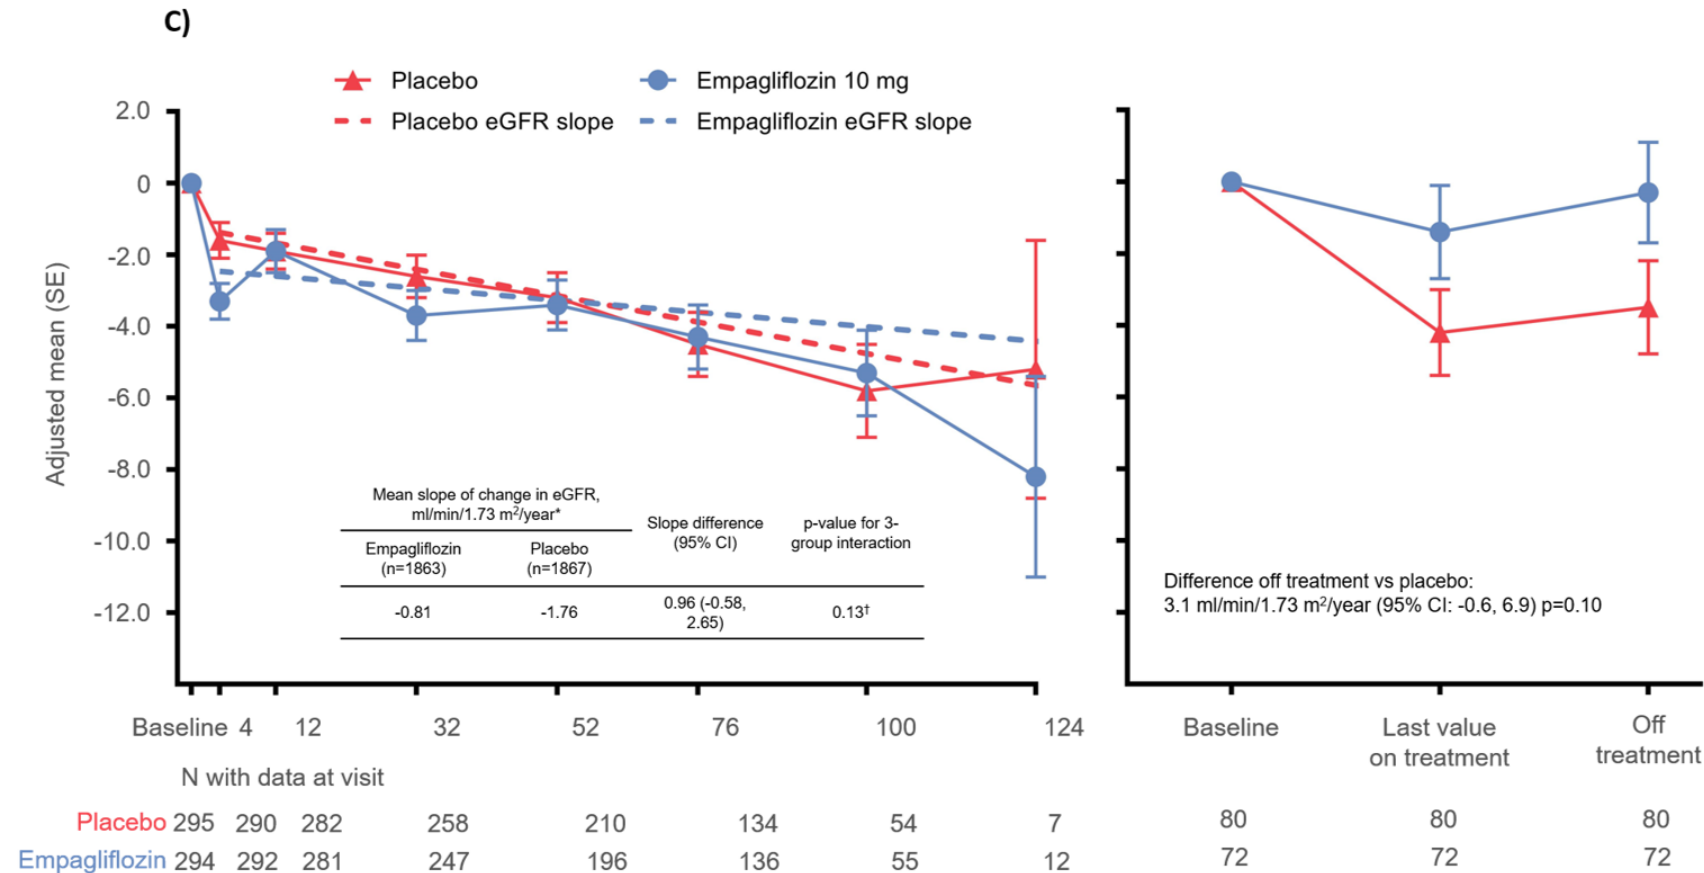

The adjusted mean change in eGFR and the mean slope of change is based on on-treatment data.

\* The slope of eGFR was analyzed on the basis of on-treatment data with a random coefficient model that included age and baseline eGFR as linear covariates and sex, region, baseline left ventricular ejection fraction, baseline eGFR according to time, diabetes according to treatment and treatment\* diabetes according to time interaction as fixed effects; the model allows for randomly varying slope and intercept between patients.

<sup>†</sup>interaction p-value assuming ordered categories (i.e. a trend analysis that reflects an assumed ordering of the subgroups from normoglycemia to prediabetes to diabetes testing a linear trend across subgroups.)

**Supplementary Figure II: Components of the primary outcome by diabetes status.**

The figures show the cumulative incidence curves of first hospitalization for heart failure in the empagliflozin and placebo group in those with (A) and without (B) diabetes, and cardiovascular mortality in the empagliflozin and placebo group in those with (C) and without (D) diabetes

**A)**

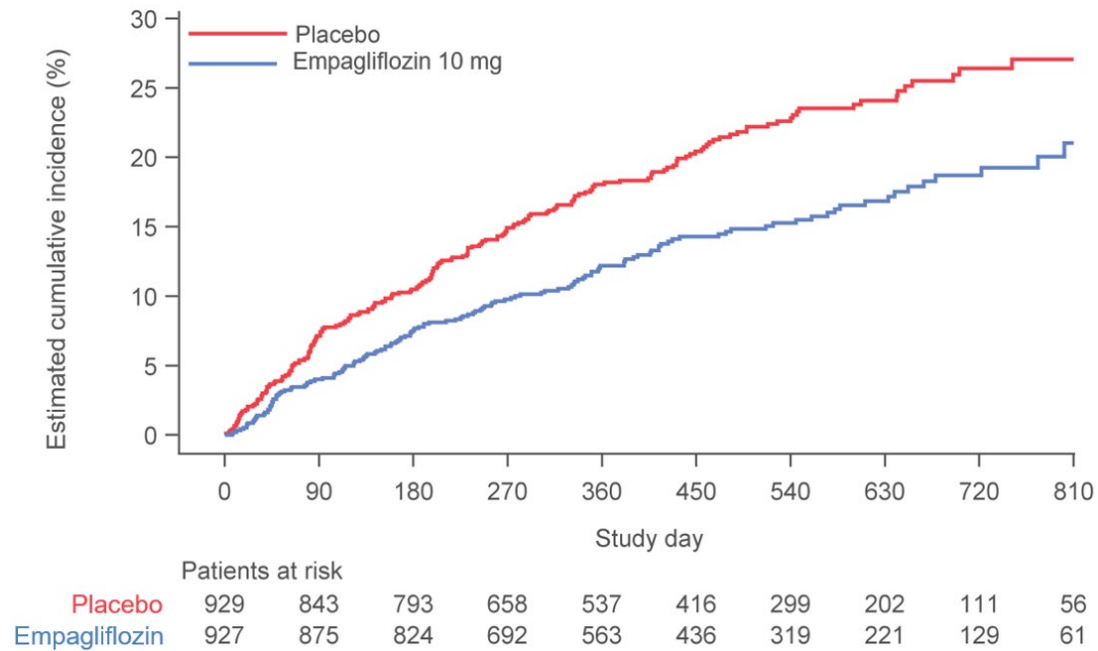

**B)**

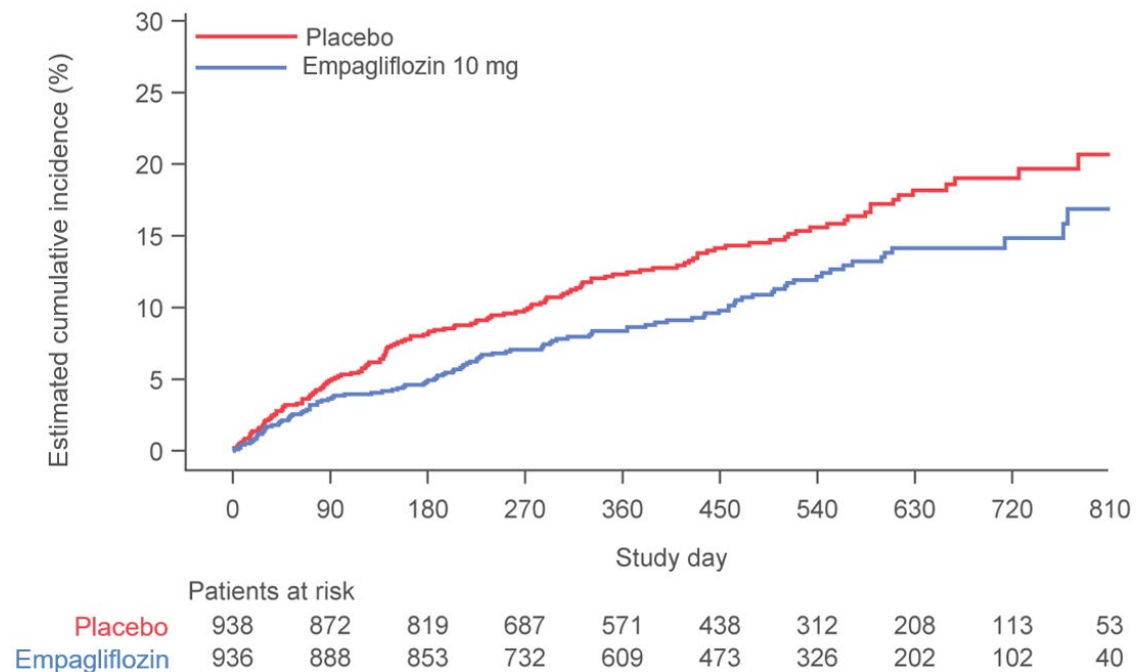

C)

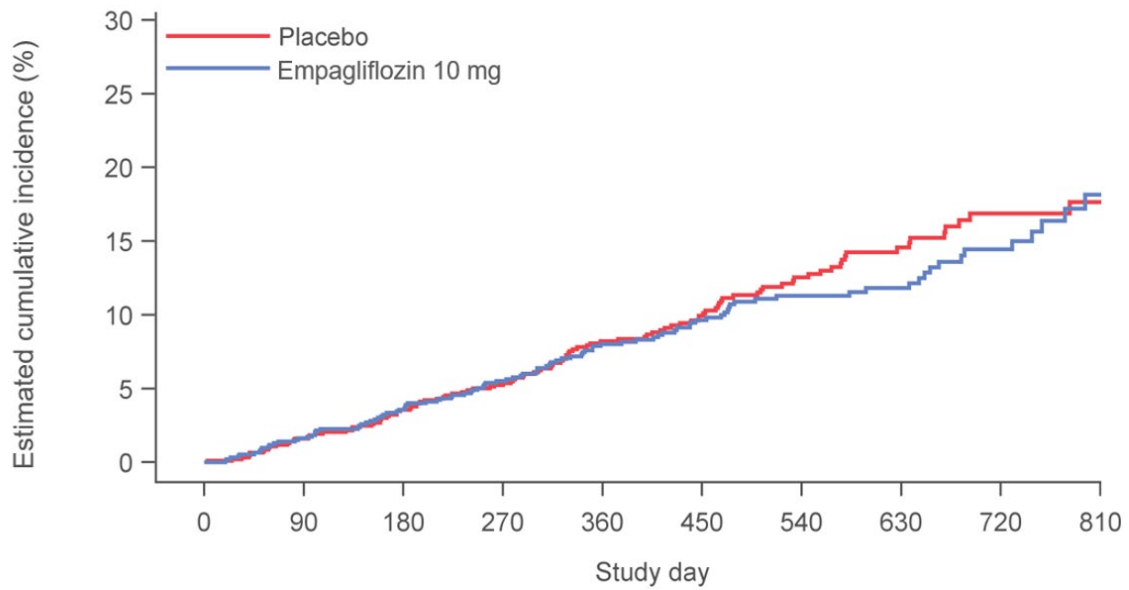

|               | Patients at risk |     |     |     |     |     |     |     |     |    |
|---------------|------------------|-----|-----|-----|-----|-----|-----|-----|-----|----|
| Placebo       | 929              | 910 | 885 | 777 | 645 | 515 | 373 | 259 | 144 | 76 |
| Empagliflozin | 927              | 906 | 878 | 756 | 629 | 499 | 374 | 264 | 156 | 70 |

D)

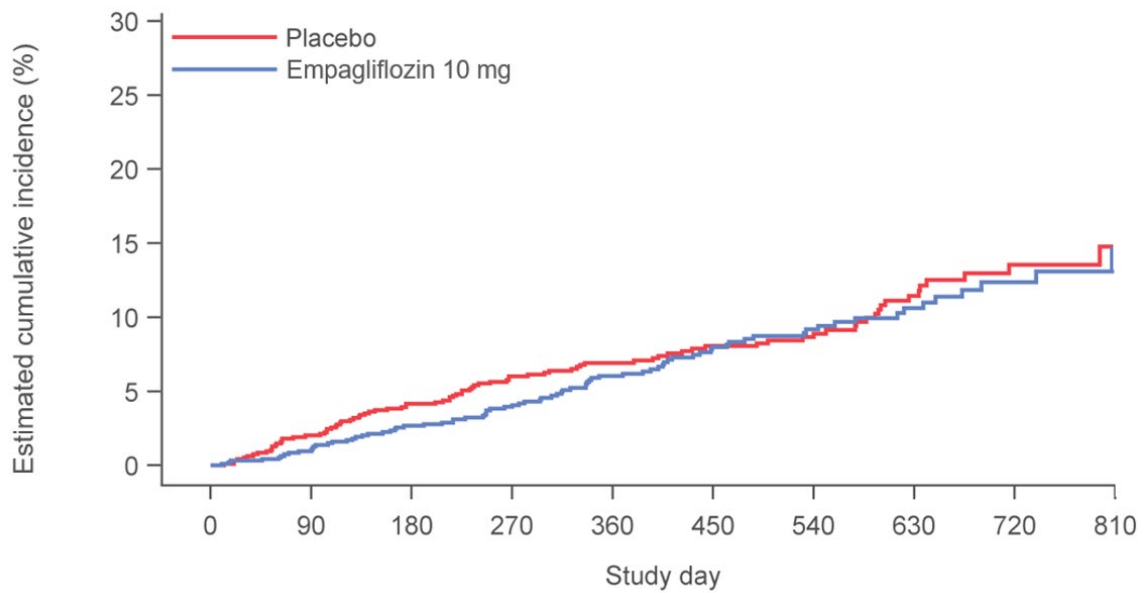

|               | Patients at risk |     |     |     |     |     |     |     |     |    |
|---------------|------------------|-----|-----|-----|-----|-----|-----|-----|-----|----|
| Placebo       | 938              | 915 | 885 | 757 | 649 | 512 | 370 | 248 | 138 | 62 |
| Empagliflozin | 936              | 923 | 894 | 781 | 660 | 516 | 368 | 242 | 125 | 52 |



**Supplementary Figure III – Adjusted mean changes in KCCQ clinical summary score from baseline in patients with (A) and without (B) diabetes based on on-treatment data**  
**A)**

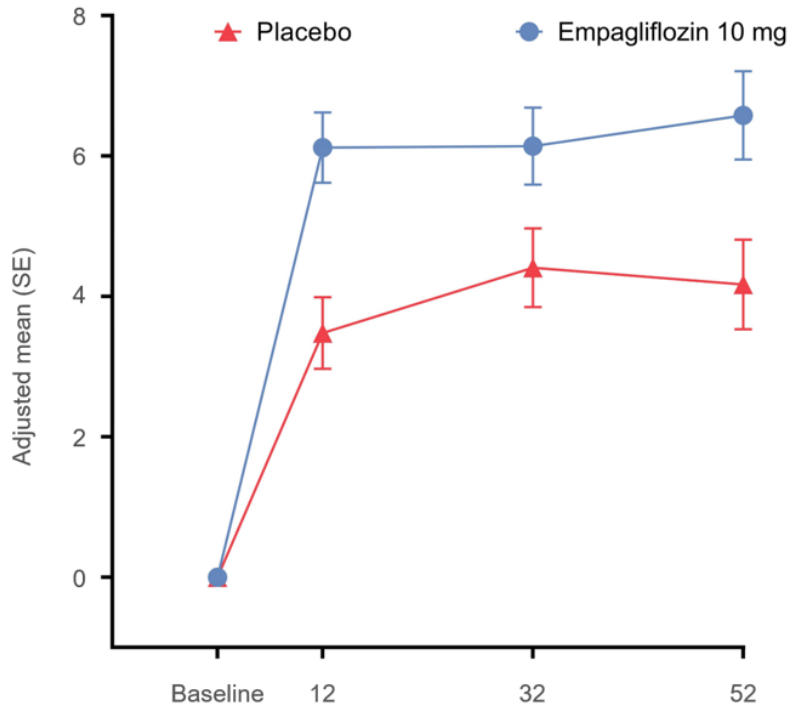

N with data at visit

|               | Baseline | 12  | 32  | 52  |
|---------------|----------|-----|-----|-----|
| Placebo       | 845      | 837 | 736 | 570 |
| Empagliflozin | 862      | 856 | 781 | 577 |

**B)**

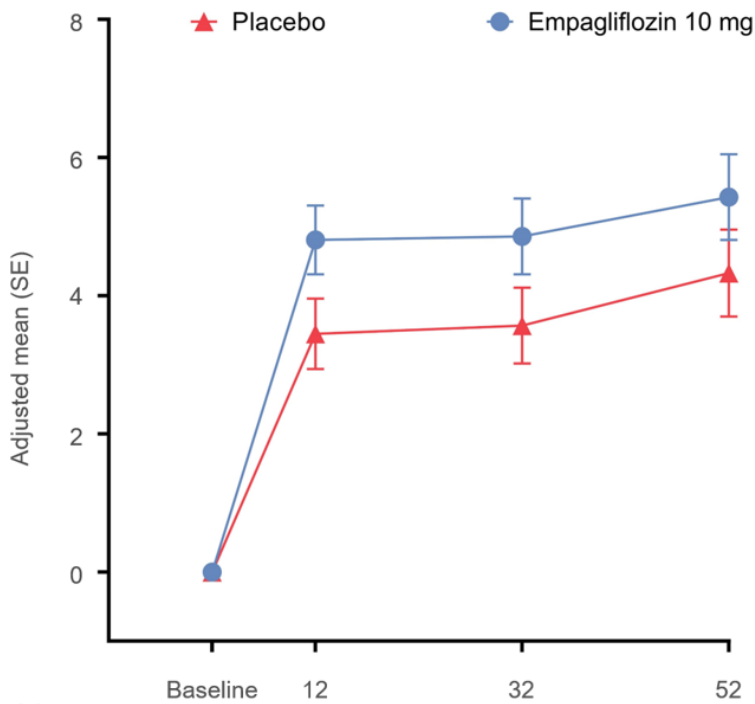

N with data at visit

|               | Baseline | 12  | 32  | 52  |
|---------------|----------|-----|-----|-----|
| Placebo       | 856      | 851 | 769 | 581 |
| Empagliflozin | 872      | 864 | 780 | 599 |

Legend: KCCQ, Kansas City Cardiomyopathy Questionnaire

**Supplementary Figure IV – Adjusted mean changes in body weight from baseline in patients with (A) and without (B) diabetes**

**A)**

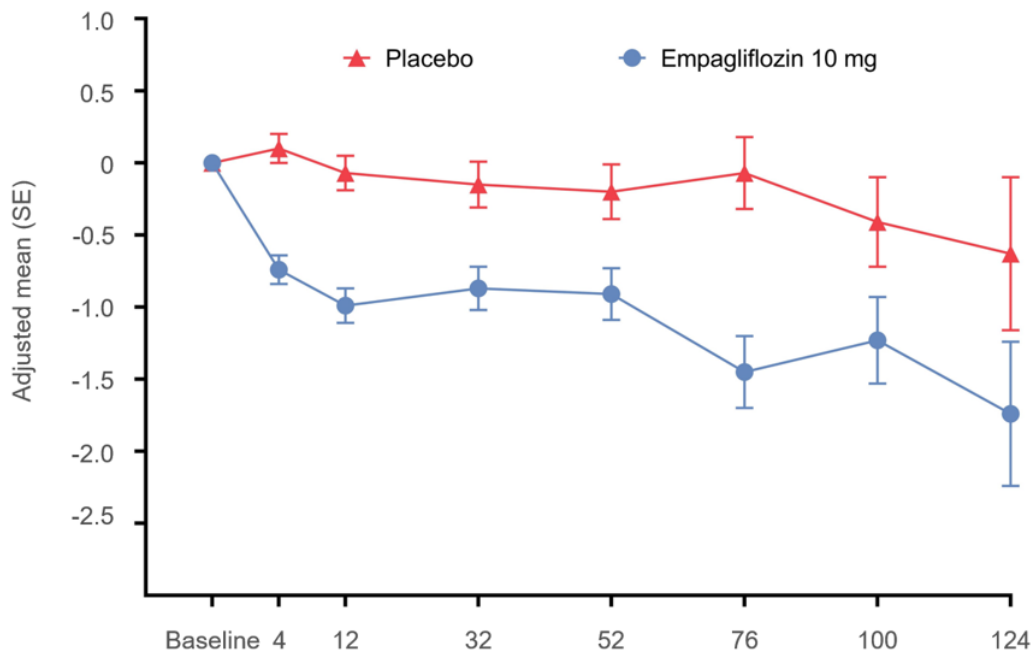

N with data at visit

|               |     |     |     |     |     |     |     |    |
|---------------|-----|-----|-----|-----|-----|-----|-----|----|
| Placebo       | 907 | 898 | 861 | 773 | 612 | 399 | 193 | 48 |
| Empagliflozin | 906 | 897 | 879 | 814 | 617 | 411 | 210 | 53 |

**B)**

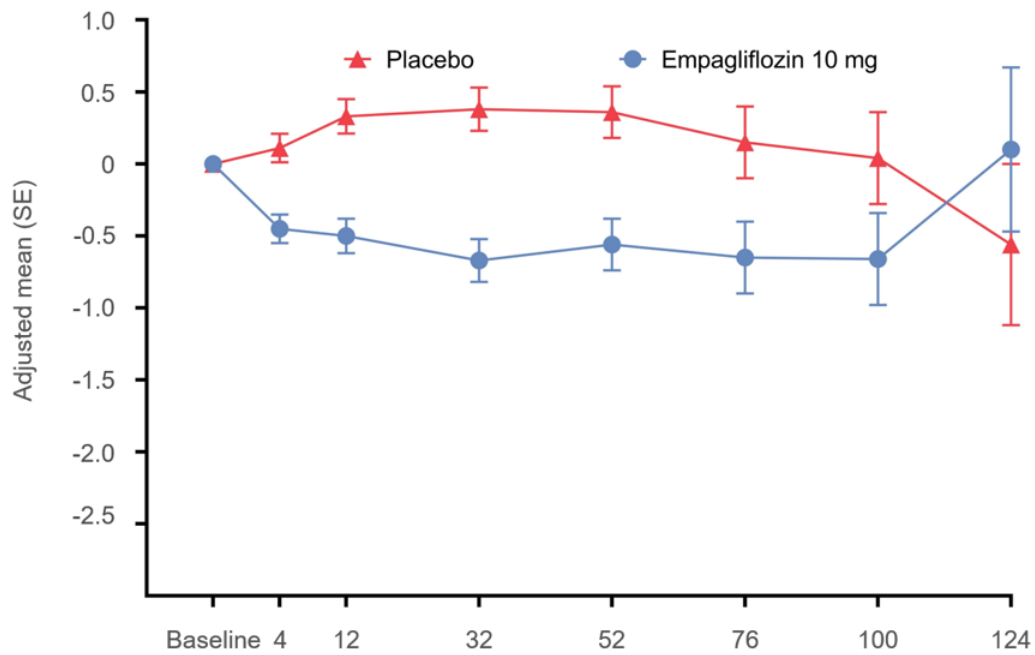

N with data at visit

|               |     |     |     |     |     |     |     |    |
|---------------|-----|-----|-----|-----|-----|-----|-----|----|
| Placebo       | 916 | 905 | 884 | 813 | 617 | 414 | 180 | 41 |
| Empagliflozin | 922 | 911 | 889 | 815 | 623 | 407 | 185 | 40 |

**Supplementary Figure V – Adjusted mean changes in hemoglobin from baseline in patients with (A) and without (B) diabetes**

A)

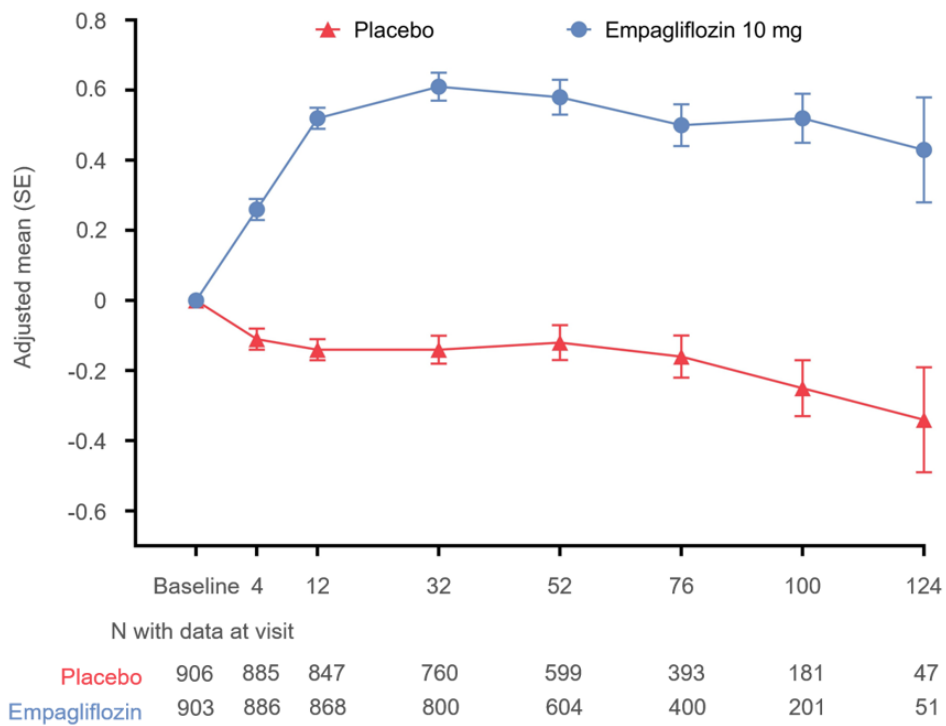

B)

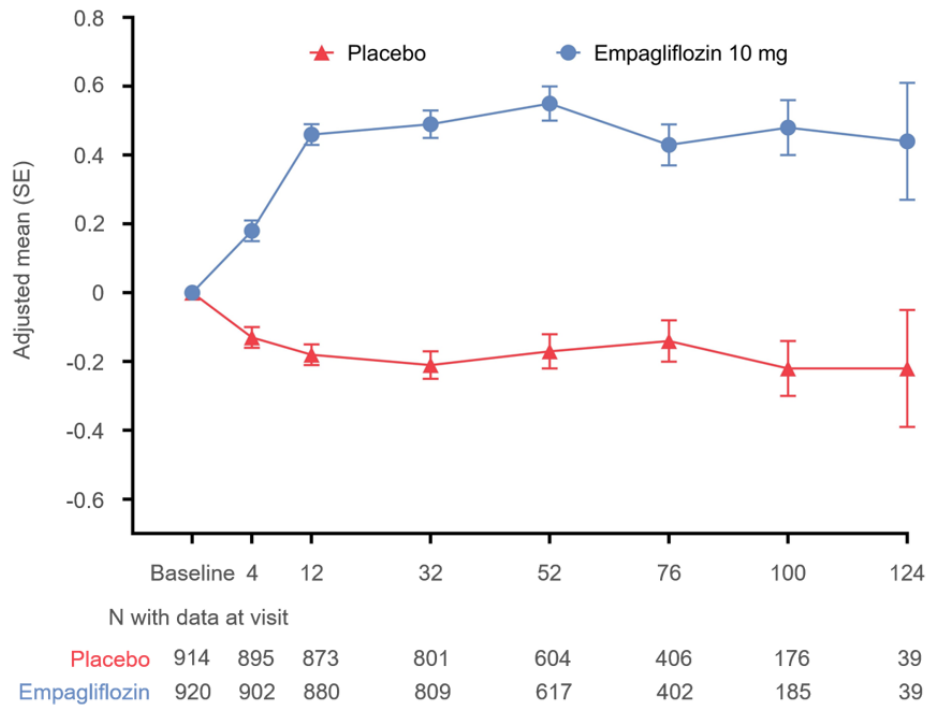

**Supplementary Figure VI – Adjusted mean changes in systolic blood pressure from baseline in patients with (A) and without (B) diabetes**

**A)**

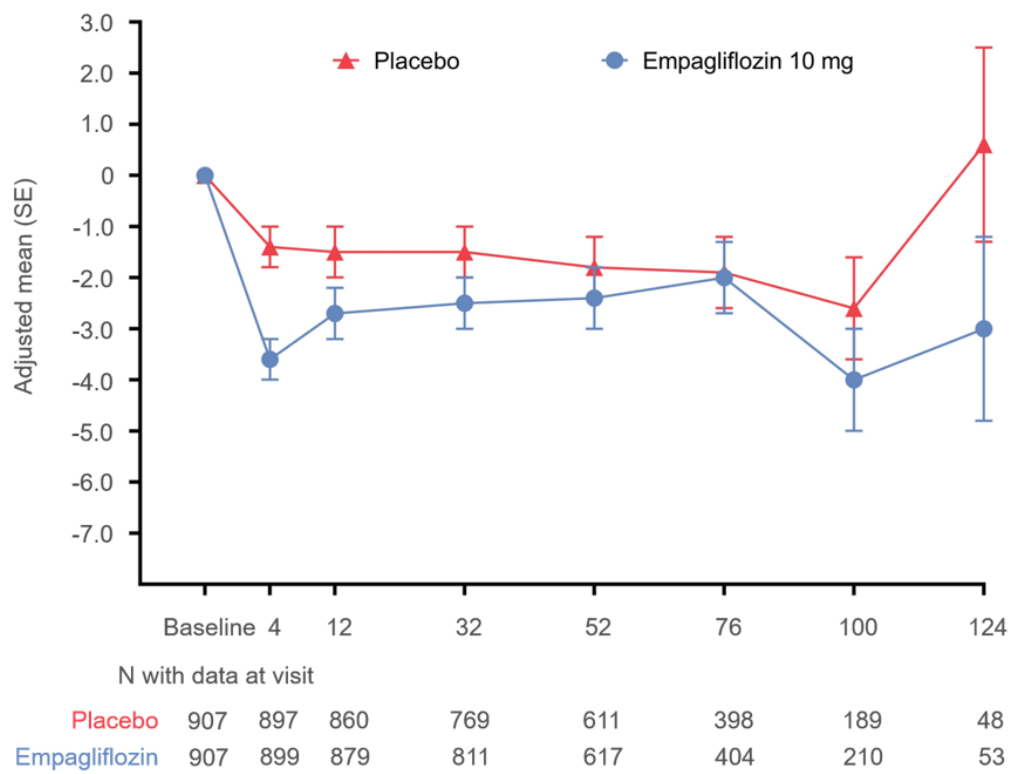

**B)**

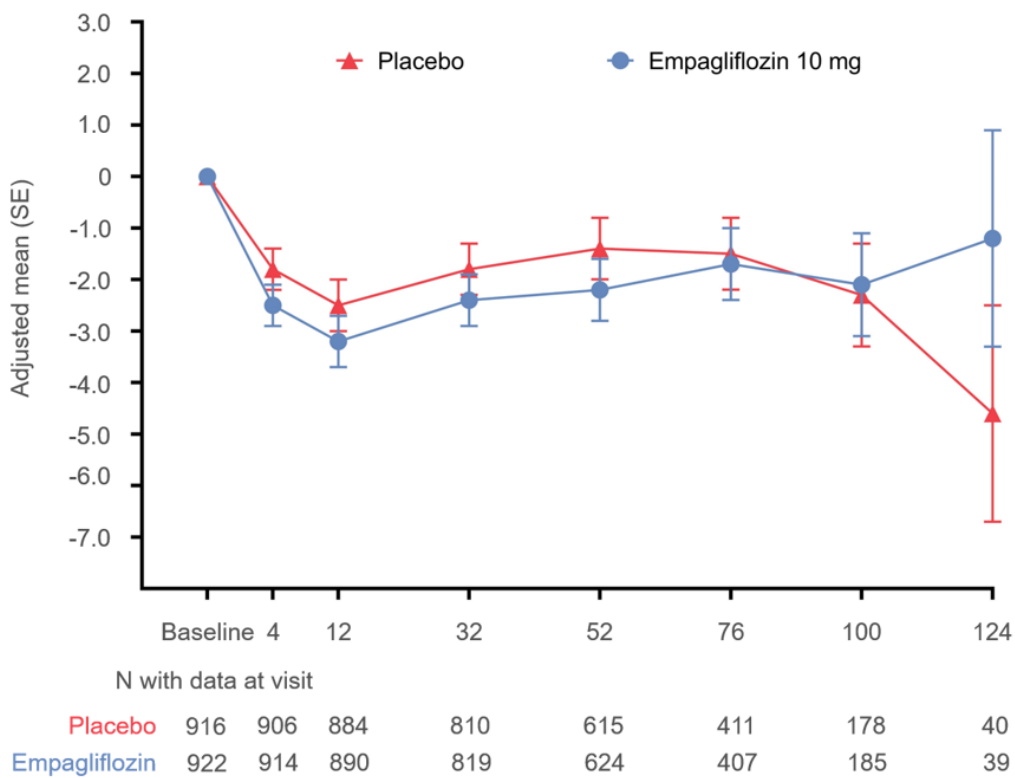

**Suppl Fig VII – Adjusted mean changes in NT-proBNP from baseline in patients with (A) and without (B) diabetes**

**A)**

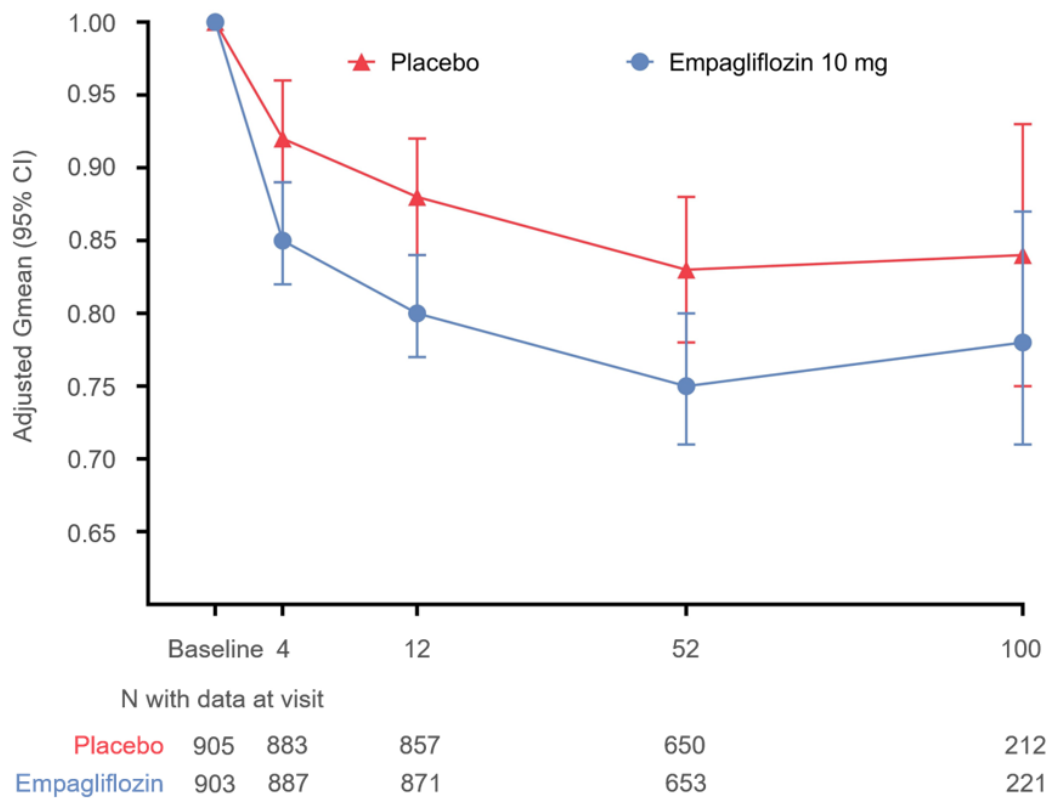

**B)**

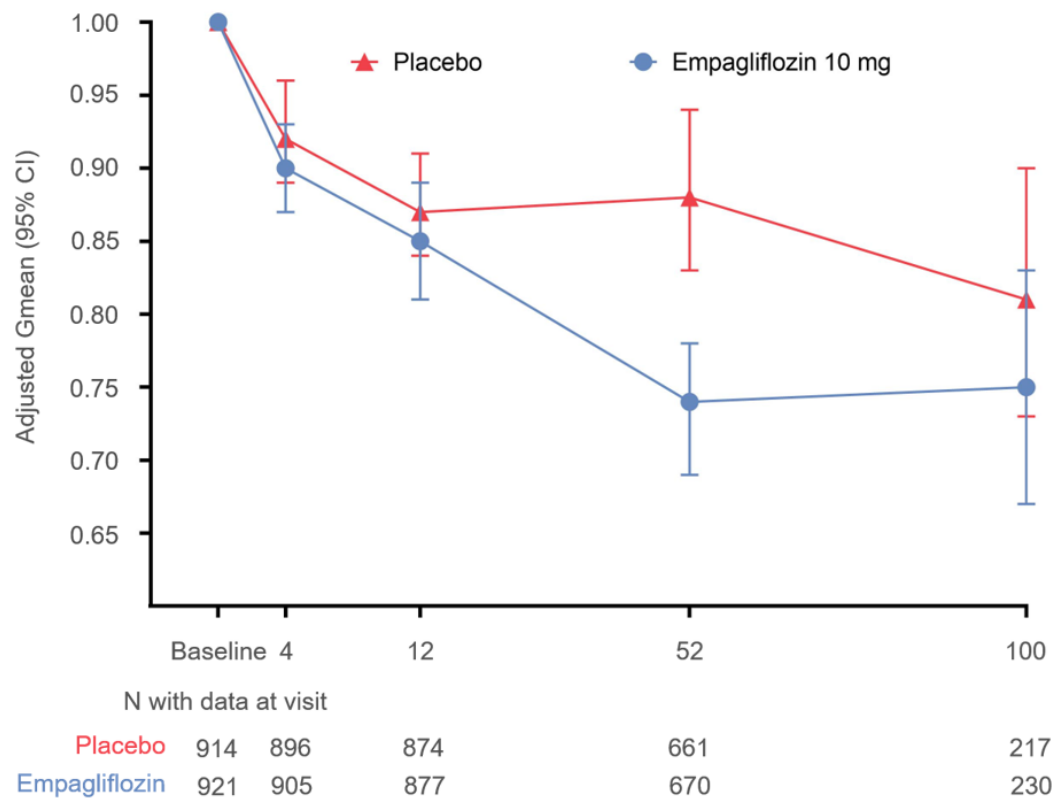

Legend: NT-proBNP, N-terminal pro-hormone B-type natriuretic peptide

**Supplementary Figure VIII: Changes of HbA1c from baseline in those with (A) and without (B) diabetes**

**A)**

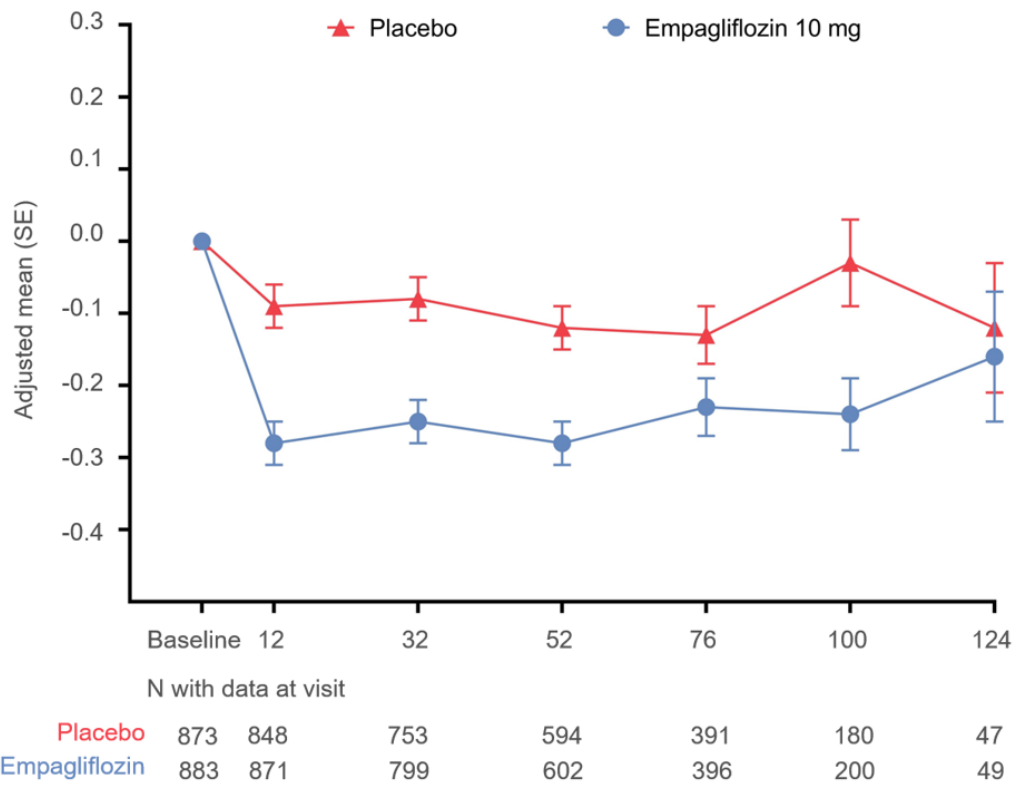

**B)**

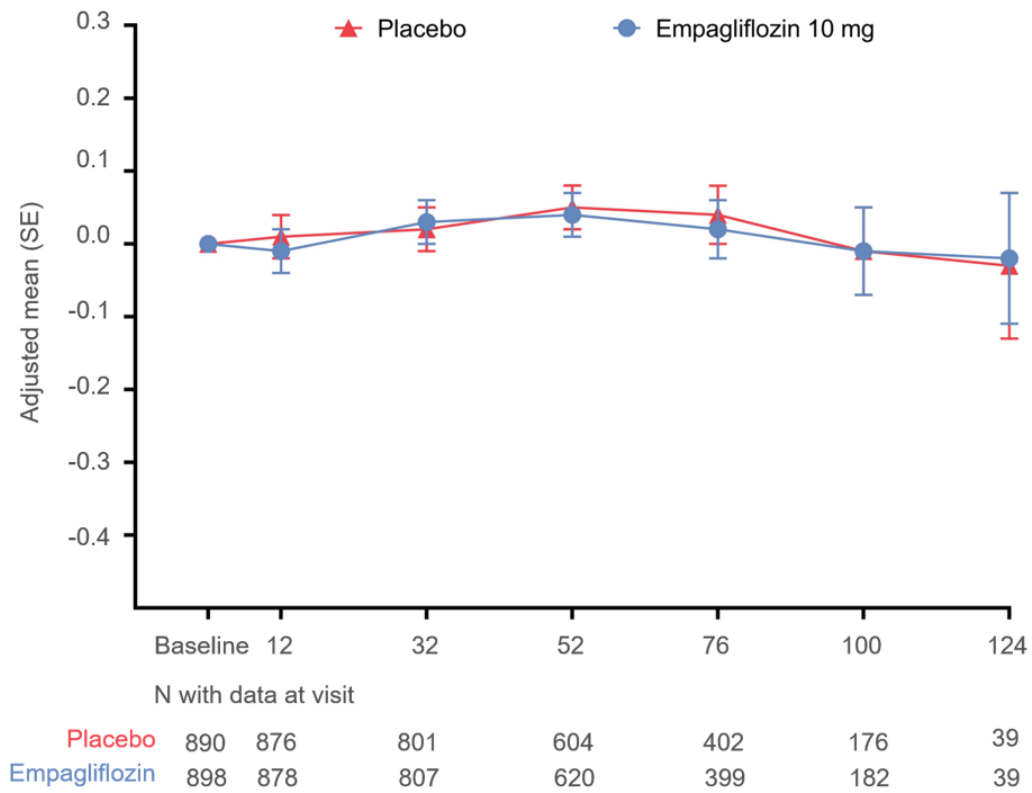

Supplement: cir-143-337-s001.pdf [file cir-143-337-s001.pdf]
